# Supplementary material for: Millennial variations in atmospheric CO 2 during the early Holocene (11.7–7.4 ka)
Source: Copernicus journal article supplement (doi:10.5194/cp-18-2063-2022), 2022-09-06
Supplement: Supplementary file 1 [file CO2 data during the early Holocene.xlsx]

## Sheet: Sheet1
	Depth [m]	Age [ka]	CO2 [ppm]	CO2 error (1sigma) [ppm]	Reference
	482.24	7.01649	264.093	0.31715	In this study
	490.19	7.28889	265.441	0.74	In this study
	490.921	7.31419	264.039	0.175	Ahn et al., 2014
	491.61	7.33779	262.208	0.826767	Ahn et al., 2014
	492.473	7.36719	263.463	0.324894	Ahn et al., 2014
	493	7.38539	264.263	0.65811	Ahn et al., 2014
	493.538	7.40369	263.671	0.4323	Ahn et al., 2014
	494.158	7.42479	262.28	0.22	Ahn et al., 2014
	494.715	7.44399	262.68	0.165	Ahn et al., 2014
	495.25	7.46199	262.787	0.953855	Ahn et al., 2014
	496.1	7.49039	265.445	0.145	Ahn et al., 2014
	496.565	7.50659	263.243	0.91368	Ahn et al., 2014
	497.043	7.52269	263.986	0.305	Ahn et al., 2014
	497.415	7.53559	263.082	0.77	Ahn et al., 2014
	497.948	7.55369	263.004	0.935	Ahn et al., 2014
	498.375	7.56859	262.839	0.83	Ahn et al., 2014
	498.95	7.58849	262.939	0.185	Ahn et al., 2014
	499.405	7.60499	264.644	0.09	Ahn et al., 2014
	499.875	7.61767	262.264	0.465	Ahn et al., 2014
	500.42	7.64233	263.334	0.33	In this study
	501.123	7.66567	263.35	0.395	Ahn et al., 2014
	501.495	7.678	263.284	0.135	Ahn et al., 2014
	502.143	7.69967	262.584	0.53	In this study
	502.683	7.72058	261.732	0.495	Ahn et al., 2014
	502.979	7.73223	264.462	0.345	Ahn et al., 2014
	504.037	7.77318	264.085	0.025	Ahn et al., 2014
	504.748	7.80241	261.171	0.265	Ahn et al., 2014
	505.17	7.81971	263.374	0.71	Ahn et al., 2014
	506.064	7.85336	263.099	0.3143	Ahn et al., 2014
	506.139	7.85605	264.087	0.475	Ahn et al., 2014
	506.618	7.87218	264.195	0.68	Ahn et al., 2014
	507.05	7.88664	263.929	0.355	Ahn et al., 2014
	507.303	7.90034	262.638	0.1	Ahn et al., 2014
	507.478	7.91154	262.938	0.02	Ahn et al., 2014
	508.146	7.93731	263.932	0.75	Ahn et al., 2014
	508.808	7.96	264.066	0.005	Ahn et al., 2014
	508.935	7.96155	267.031	0.715	Ahn et al., 2014
	508.993	7.96414	266.911	0.185	Ahn et al., 2014
	510.063	8.01085	263.043	0.735	Ahn et al., 2014
	510.13	8.01341	266.642	0.755	Ahn et al., 2014
	510.31	8.02	263.287	0.2	Ahn et al., 2014
	510.853	8.03467	264.421	1.09	Ahn et al., 2014
	510.985	8.044	262.227	0.563092	Ahn et al., 2014
	511.337	8.05929	264.288	0.700008	Ahn et al., 2014
	511.46	8.06	261.456	0.105	Ahn et al., 2014
	511.835	8.07854	265.306	0.5	Ahn et al., 2014
	512.752	8.11	262.827	0.244563	Ahn et al., 2014
	512.975	8.12	265.566	0.305	Ahn et al., 2014
	513.102	8.124	266.789	0.310854	Ahn et al., 2014
	513.275	8.13	265.663	0.2	Ahn et al., 2014
	513.445	8.14	264.731	0.264344	Ahn et al., 2014
	513.688	8.156	264.664	0.625	Ahn et al., 2014
	513.75	8.16	262.381	1.015	Ahn et al., 2014
	514.165	8.17692	265.115	0.325	Ahn et al., 2014
	514.341	8.19	266.409	0.485	Ahn et al., 2014
	514.726	8.20813	263.85	0.12	Ahn et al., 2014
	515.09	8.22886	263.402	0.785	Ahn et al., 2014
	515.347	8.24	264.392	0.78	Ahn et al., 2014
	515.457	8.24	264.374	0.64115	Ahn et al., 2014
	515.817	8.26	265.115	0.75	Ahn et al., 2014
	516.24	8.27867	262.575	0.03	Ahn et al., 2014
	516.5	8.28852	264.278	0.165	Ahn et al., 2014
	516.59	8.292	262.8	0.5	Ahn et al., 2014
	516.688	8.296	262.681	0.06	Ahn et al., 2014
	516.788	8.3	264.106	0.8	Ahn et al., 2014
	517.25	8.31	263.772	0.969971	Ahn et al., 2014
	517.617	8.32805	263.606	1.05	Ahn et al., 2014
	517.92	8.33061	262.218	0.41	Ahn et al., 2014
	518.65	8.35867	262.196	0.760948	Ahn et al., 2014
	518.835	8.36407	262.108	0.395657	Ahn et al., 2014
	519.825	8.38924	264.778	0.231325	Ahn et al., 2014
	520.38	8.40909	264.158	0.045	Ahn et al., 2014
	520.665	8.41964	263.558	1.04157	Ahn et al., 2014
	520.94	8.42703	265.26	0.771384	Ahn et al., 2014
	521.325	8.43927	265.78	0.595	Ahn et al., 2014
	521.983	8.46079	263.435	0.36	Ahn et al., 2014
	522.442	8.47603	263.048	0.035	Ahn et al., 2014
	522.942	8.49551	265.728	0.345	Ahn et al., 2014
	523.05	8.5	265.888	0.0293	In this study
	523.295	8.50758	264.785	0.39	Ahn et al., 2014
	523.923	8.52636	267.989	0.640807	Ahn et al., 2014
	524.418	8.54256	264.559	0.71	Ahn et al., 2014
	525.107	8.56537	265.893	0.03	Ahn et al., 2014
	525.133	8.56603	268.395	0.71	Ahn et al., 2014
	525.612	8.57923	265.121	1.05	Ahn et al., 2014
	526.365	8.60214	266.127	0.165	Ahn et al., 2014
	527.035	8.62607	266.814	0.420677	Ahn et al., 2014
	527.675	8.64738	266.443	0.923496	Ahn et al., 2014
	528.413	8.67112	265.657	0.31	Ahn et al., 2014
	528.997	8.68766	269.186	0.555	Ahn et al., 2014
	529.505	8.70231	266.707	0.615	Ahn et al., 2014
	530.043	8.71978	265.651	0.24	Ahn et al., 2014
	530.525	8.73675	265.972	0.18	In this study
	531.015	8.75512	266.746	1.09	Ahn et al., 2014
	531.454	8.7696	265.779	0.16	Ahn et al., 2014
	532.075	8.78976	267.163	0.115	Ahn et al., 2014
	532.567	8.80586	266.023	0.215	Ahn et al., 2014
	533.087	8.82308	266.588	0.455	Ahn et al., 2014
	533.515	8.83514	266.128	0.025	Ahn et al., 2014
	533.95	8.8472	267.173	0.205	Ahn et al., 2014
	534.518	8.86725	264.251	0.28	Ahn et al., 2014
	534.905	8.88156	267.078	0.9	Ahn et al., 2014
	535.428	8.89861	264.2	0.45	Ahn et al., 2014
	536.05	8.91703	263.917	0.319753	Ahn et al., 2014
	536.278	8.92371	264.83	0.48	Ahn et al., 2014
	537.112	8.94743	262.653	1.01611	Ahn et al., 2014
	537.515	8.96196	262.783	0.02	Ahn et al., 2014
	538.066	8.98252	264.567	0.45	Ahn et al., 2014
	538.515	8.99633	264.365	0.41	Ahn et al., 2014
	539.061	9.01	262.767	0.9386	In this study
	540.05	9.04435	260.348	1.52461	In this study
	541.09	9.07449	263.253	0.733	In this study
	542.21	9.11	267.499	1.23641	In this study
	543.079	9.14	267.025	1.105	In this study
	544.148	9.16824	265.508	0.2614	In this study
	545.05	9.2017	262.66	1.74721	In this study
	546.021	9.23	262.861	0.3193	In this study
	547.175	9.26735	264.785	1.26617	In this study
	549.07	9.32516	264.101	0.50545	In this study
	550.205	9.35448	266.054	1.20397	In this study
	551.05	9.38282	268.536	0.98895	In this study
	551.933	9.40871	268.234	1.00916	In this study
	553	9.4432	266.71	1.27254	In this study
	553.95	9.4736	266.977	0.47285	In this study
	554.668	9.49248	269.047	1.11495	In this study
	555.95	9.53	265.315	1.53	In this study
	557.05	9.56674	270.019	1.53	In this study
	558.035	9.60037	268.833	0.45745	In this study
	559.05	9.62765	272.006	1.0445	In this study
	560.05	9.66615	269.572	0.73465	In this study
	560.575	9.68246	269.892	0.89275	In this study
	560.965	9.69446	268.46	1.05457	In this study
	561.95	9.7254	269.885	1.0247	In this study
	563.05	9.7611	268.49	0.54995	In this study
	564.104	9.79705	269.283	0.0203	In this study
	565.05	9.83	271.246	0.09965	In this study
	565.952	9.85	273.171	0.3782	In this study
	567.255	9.9	268.005	0.0947	In this study
	567.95	9.92	270.397	1.20865	In this study
	568.375	9.93	269.412	0.2573	In this study
	570.659	10.01	272.595	0.2516	In this study
	571.05	10.02	273.403	0.75685	In this study
	572.05	10.05	270.334	0.6523	In this study
	572.925	10.08	269.099	0.1003	In this study
	573.882	10.11	268.913	1.28348	In this study
	574.89	10.14	268.306	0.4339	In this study
	575.625	10.1618	267.057	1.22665	In this study
	577.05	10.21	270.922	1.16634	In this study
	577.825	10.2384	271.658	1.25409	In this study
	578.15	10.25	271.83	0.1144	In this study
	578.58	10.26	270.886	0.4052	In this study
	579.05	10.27	269.273	0.927228	In this study
	579.7	10.29	270.705	0.31005	In this study
	580.095	10.3032	269.844	0.0197	In this study
	580.325	10.3108	271.549	0.12545	In this study
	580.61	10.32	271.24	0.1467	In this study
	581.09	10.34	271.546	1.0488	In this study
	581.492	10.35	271.668	0.7812	In this study
	582.012	10.3607	270.008	1.36733	In this study
	582.565	10.38	270.831	0.4657	In this study
	583.035	10.3962	271.245	0.1805	In this study
	583.531	10.4127	272.461	1.04187	In this study
	584.05	10.43	271.018	1.66873	In this study
	584.503	10.44	274.359	1.4822	In this study
	584.987	10.46	271.774	0.507849	In this study
	586.05	10.49	274.817	0.66065	In this study
	586.95	10.52	271.819	1.06545	In this study
	588.03	10.56	273.45	0.8451	In this study
	589.05	10.59	271.018	0.72095	In this study
	590.04	10.62	273.639	0.608736	In this study
	591.003	10.6588	270.374	1.42244	In this study
	592.25	10.697	274.414	1.22	In this study
	593.023	10.7211	270.386	1.5786	In this study
	593.937	10.75	273.926	0.5132	In this study
	594.997	10.79	272.362	0.2874	In this study
	595.921	10.82	272.615	0.5793	In this study
	596.978	10.8565	279.938	0.5	In this study
	598.181	10.8981	270.852	1.56307	In this study
	598.865	10.92	273.658	0.6571	In this study
	599.845	10.9511	274.902	1.00115	In this study
	600.99	10.9873	272.995	0.34665	In this study
	601.775	11.01	271.955	0.61425	In this study
	602.775	11.0448	270.19	1.05712	In this study
	603.79	11.08	272.151	1.16105	In this study
	605	11.1193	263.494	1.31005	In this study
	606.255	11.16	270.703	1.2635	In this study
	607.54	11.2	272.617	0.197	In this study
	608.635	11.23	271.696	0.7955	In this study
	609.942	11.2766	270.911	0.4915	In this study
	611.153	11.32	271.427	0.43855	In this study
	612.201	11.348	275.494	0.713775	In this study
	613.555	11.3926	269.511	0.44735	In this study
	614.13	11.4072	272.893	0.0726	In this study
	614.305	11.4121	274.676	1.00538	In this study
	615.822	11.4591	271.715	0.976478	In this study
	615.9	11.4618	271.997	1.47055	In this study
	616.896	11.4939	273.2	0.5073	In this study
	617.78	11.522	269.608	0.13525	In this study
	618.033	11.53	270.29	1.07435	In this study
	619.1	11.56	268.538	0.42195	In this study
	620.178	11.59	270.023	0.73225	In this study
	621.224	11.6282	266.752	0.8326	In this study
	622.986	11.691	259.289	1.29931	In this study
	625.096	11.7886	260.593	0.4402	In this study
							99
