# Supplementary material for: Millennial variations in atmospheric CO 2 during the early Holocene (11.7–7.4 ka)
Source: Copernicus journal article supplement (doi:10.5194/cp-18-2063-2022), 2022-09-06
Supplement: Supplementary file 1 [file cp-18-2063-2022-supplement.zip]

Archive with 3 entries (3 files):
- CO2 data during the early Holocene.xlsx
- cp-18-2063-2022-supplement-title-page.pdf
- Supplement Shin et al., 2022..pdf
