# Supplementary material for: Millennial variations in atmospheric CO 2 during the early Holocene (11.7–7.4 ka)
Source: Copernicus journal article supplement (doi:10.5194/cp-18-2063-2022), 2022-09-06
Supplement: Supplementary file 1 [file cp-18-2063-2022-supplement.zip › cp-18-2063-2022-supplement-title-page.pdf]

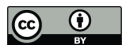

## *Supplement of*

# **Millennial variations in atmospheric CO<sub>2</sub> during the early Holocene (11.7–7.4 ka)**

**Jinhwa Shin et al.**

*Correspondence to:* Jinho Ahn ([jinhoahn@snu.ac.kr](mailto:jinhoahn@snu.ac.kr))

- [cp-18-2063-2022-supplement-title-page.pdf](#)
- [CO2 data during the early Holocene.xlsx](#)
- [Supplement Shin et al., 2022..pdf](#)

The copyright of individual parts of the supplement might differ from the article licence.
